# Supplementary material for: Carbon black/silicon nitride nanocomposites as high-efficiency counter electrodes for dye-sensitized solar cells
Source: Royal Society of Chemistry journal article supplement (doi:10.1039/c8nj00398j), 2018-01-01
Supplement: c8nj00398j1.pdf [file c8nj00398j1.pdf]

## Supporting information

# Carbon Black /Silicon Nitride Nanocomposites as High-Efficiency Counter Electrodes for Dye-Sensitized Solar Cells

*Abdelaal. S. A. Ahmed<sup>1, 2</sup>, Wanchun Xiang<sup>1\*</sup>, Anna Gu<sup>1</sup>, Xiaowei Hu<sup>1</sup>, Ibrahim Saana Amiinu<sup>3</sup>,  
Xiujuan Zhao<sup>1\*</sup>*

<sup>1</sup> State Key Laboratory of Silicate Materials for Architecture, Wuhan University of Technology, Luoshi Road, Wuhan 430070, P. R. China

<sup>2</sup> Chemistry Department, Faculty of Science, Al-Azhar University, Assiut, 71524, Egypt

<sup>3</sup> State Key Laboratory of Advanced Materials Synthesis and Processing, Wuhan University of Technology, Luoshi Road, Wuhan 430070, P. R. China

### **\*Corresponding authors:**

Email address: [xiangwanchun@whut.edu.cn](mailto:xiangwanchun@whut.edu.cn) (W. Xiang) and [opluse@whut.edu.cn](mailto:opluse@whut.edu.cn) (X. Zhao).

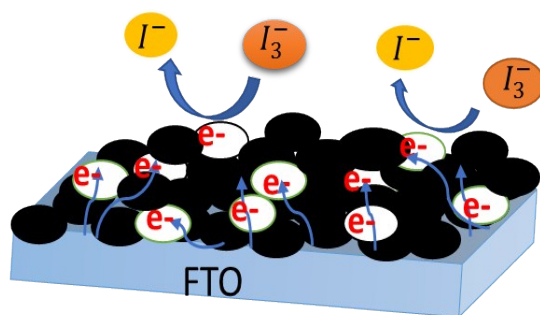

● Carbon black    ○ Si<sub>3</sub>N<sub>4</sub>

Scheme 1. CB-Si<sub>3</sub>N<sub>4</sub> composite CE for Triiodide Reduction

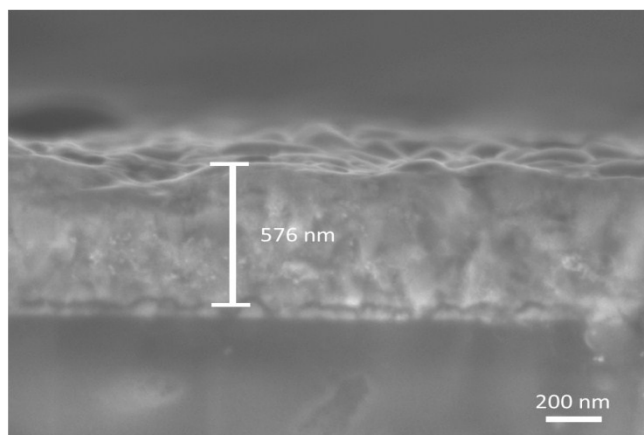

**Fig. S1** Cross-section image of Pt CE.

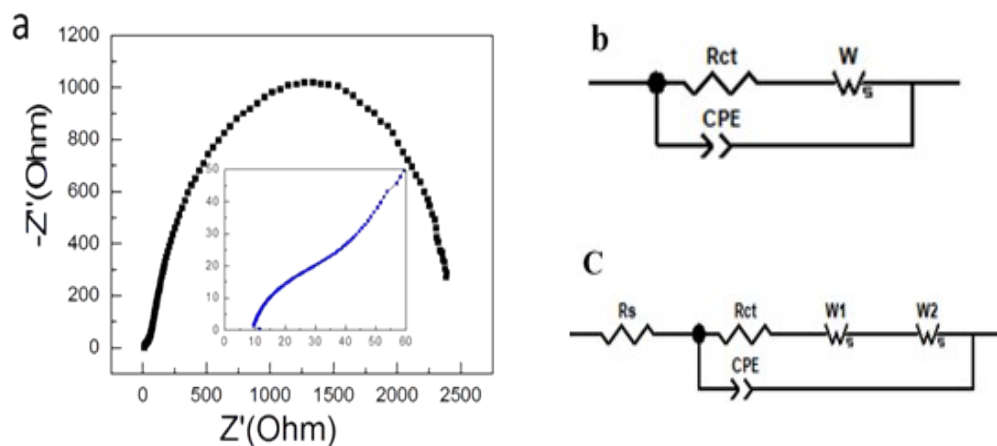

**Fig. S2 (a)** Nyquist plot of the CB-Si<sub>3</sub>N<sub>4</sub>-3% with 1.4 μm thickness and (b and C) Equivalent circuits used for fitting the electrochemical parameters for Pt and CB-Si<sub>3</sub>N<sub>4</sub> dummy cells respectively.

**Table S1** Corresponding parameters of CV, Bode EIS, and Tafel of CB, Si<sub>3</sub>N<sub>4</sub> and CB-Si<sub>3</sub>N<sub>4</sub>-x based CEs and the corresponding DSSCs

| CE                                    | $I_{PC}$<br>(mAcm <sup>-2</sup> ) | $E_{pp}$<br>(V) | $R_s$<br>(Ω) | $R_{ct}$<br>(Ω) | CPE-T<br>(μF) | $W_1$<br>(Ω) | $W_2$<br>(Ω) | Log $J_0$<br>(mA cm <sup>-2</sup> ) | Log $J_{lim}$<br>(mA cm <sup>-2</sup> ) | $R_{ct}$ Tafel<br>(Ω) |
|---------------------------------------|-----------------------------------|-----------------|--------------|-----------------|---------------|--------------|--------------|-------------------------------------|-----------------------------------------|-----------------------|
| Bare CB                               | -0.14                             | 620             | 8.73         | 18.10           | 6.75          | 92.77        | 110.60       | 0.28                                | 23.44                                   | 32.22                 |
| CB-Si <sub>3</sub> N <sub>4</sub> -1% | -0.69                             | 600             | 7.21         | 4.25            | 14.20         | 37.70        | 68.55        | 0.51                                | 45.71                                   | 1.89                  |
| CB-Si <sub>3</sub> N <sub>4</sub> -3% | -1.30                             | 560             | 7.42         | 2.34            | 21.98         | 21.16        | 29.62        | 0.87                                | 60.26                                   | 0.83                  |
| CB-Si <sub>3</sub> N <sub>4</sub> -5% | -1.15                             | 560             | 9.86         | 2.48            | 28.30         | 43.95        | 55.11        | 0.08                                | 14.45                                   | 5.10                  |

$I_{PC}$  is the cathodic current density,  $R_{ct}$  is the charge transfer resistance at the cathode- electrolyte interface,  $R_s$  is the series resistance, CPE-T is the capacitance at the cathode-electrolyte interface;  $W_1$ , mass transport impedance,  $W_2$  is the Nernst diffusion impedance of the redox couple ( $I_3^-/I^-$ ),  $E_{pp}$  is the peak –peak separation of cyclic voltamogram,  $J_0$  the exchange current density;  $J_{lim}$  the limiting diffusion current density.

**Table S2** Corresponding parameters of CV, Bode EIS, and Tafel of Pt and CB-Si<sub>3</sub>N<sub>4</sub>-3% CEs with different thickness and the corresponding DSSCs

| CE Thickness  | I <sub>PC</sub><br>(mAcm <sup>-2</sup> ) | E <sub>pp</sub><br>(mV) | R <sub>s</sub><br>(Ω) | R <sub>ct</sub><br>(Ω) | CPE-T<br>(μF) | W <sub>1</sub><br>(Ω) | W <sub>2</sub><br>(Ω) | Log J <sub>0</sub><br>(mAcm <sup>-2</sup> ) | Log J <sub>lim</sub><br>(mAcm <sup>-2</sup> ) | R <sub>ct</sub> Tafel<br>(Ω) |
|---------------|------------------------------------------|-------------------------|-----------------------|------------------------|---------------|-----------------------|-----------------------|---------------------------------------------|-----------------------------------------------|------------------------------|
| 1.4μm         | -0.33                                    | 640                     | 9.08                  | 53.52                  | 14.40         | 1580                  | 2817                  | -1.45                                       | -0.07                                         | 172.45                       |
| 2.4μm         | -0.41                                    | 620                     | 7.96                  | 2.62                   | 17.95         | 68.69                 | 107.30                | -0.49                                       | 0.66                                          | 18.89                        |
| 4.7μm         | -1.30                                    | 560                     | 7.42                  | 2.34                   | 21.98         | 21.16                 | 29.62                 | 0.87                                        | 1.78                                          | 0.83                         |
| 9.4μm         | -1.35                                    | 500                     | 9.07                  | 2.26                   | 31.85         | 15.49                 | 20.75                 | 1.20                                        | 1.98                                          | 0.39                         |
| 14.1μm        | -1.60                                    | 620                     | 8.85                  | 0.85                   | 38.60         | 06.06                 | 07.33                 | 1.30                                        | 2.12                                          | 0.31                         |
| Pt (0.58 μm ) | -1.93                                    | 320                     | 6.28                  | 3.19                   | 47.76         | ---                   | 02.03                 | 1.50                                        | 33.11                                         | 0.12                         |
